# Supplementary material for: Vascular lumen simulation and highly-sensitive nitric oxide detection using three-dimensional gelatin chip coupled to TiC/C nanowire arrays microelectrode
Source: Royal Society of Chemistry journal article supplement (doi:10.1039/c2lc40148g), 2012-01-01
Supplement: c2lc40148g.pdf [file c2lc40148g.pdf]

## Supporting Information for

# Vascular lumen simulation and highly-sensitive nitric oxide detection using three-dimensional gelatin chip coupled to TiC/C nanowire arrays microelectrode

*Lin-Mei Li,<sup>a,†</sup> Xue-Ying Wang,<sup>a,†</sup> Liang-Sheng Hu,<sup>b</sup> Rong-Sheng Chen,<sup>b</sup> Ying Huan<sup>a</sup> Shi-Jing Che,<sup>a</sup> Wei-Hua Huang,<sup>a\*</sup> Kai-Fu Huo<sup>b,c\*</sup> and Paul K Chu<sup>c</sup>*

<sup>a</sup> Key Laboratory of Analytical Chemistry for Biology and Medicine (Ministry of Education), College of Chemistry and Molecular Sciences, Wuhan University, Wuhan 430072, China

<sup>b</sup> College of Chemical Engineering and Technology and School of Materials and Metallurgy, Wuhan University of Science and Technology, Wuhan 430081, China

<sup>c</sup> Department of Physics and Materials Science, City University of Hong Kong, Tat Chee Avenue, Kowloon, Hong Kong, China

<sup>†</sup> These two authors contributed equally to this paper

E-mail: [whuang@whu.edu.cn](mailto:whuang@whu.edu.cn)

or [kfhuo@wust.edu.cn](mailto:kfhuo@wust.edu.cn)

### **This file includes:**

Figure S1, Figure S2

### **Other Supporting Online Material for this manuscript includes the following:**

Movie S1

Movie S2

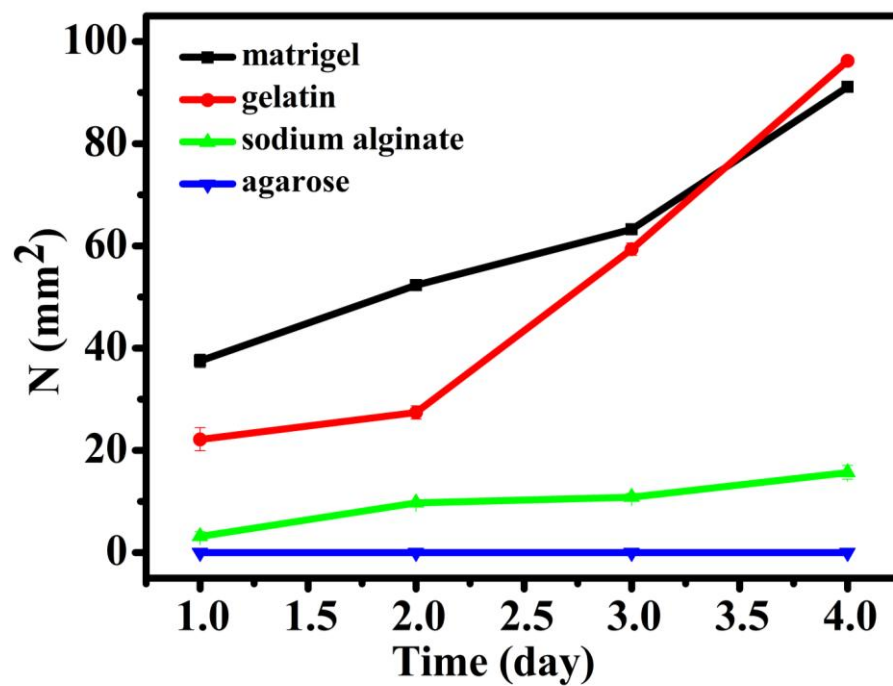

**Fig. S1** The adherence and proliferation of Endothelial cells on different hydrogel surfaces after culturing 4 days under static conditions

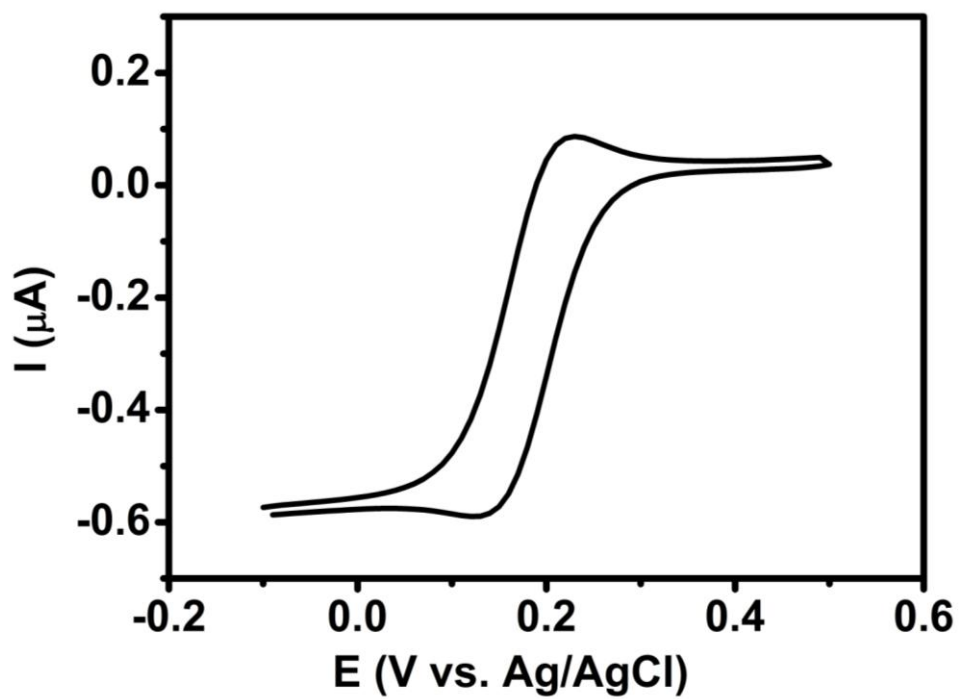

**Fig. S2** Cyclic Voltammograms obtained at the TiC/C NW arrays microelectrode for (A) 1 mM  $\text{K}_3[\text{Fe}(\text{CN})_6]$  in 0.1 M KCl aqueous solution at a scan rate of 100 mV/s.

**Movie S1** Proliferation of Endothelial cells at the different layer positions of lining of a circular gelatin lumen cultured after 5 days under static conditions obtaining from Z-stack model, labeled with calcein-AM and PI.

**Movie S2** ECs cultured in gelatin lumen under pulsatile flow conditions during 20 h (frequency 1 Hz, flow rate 1.3 mL/min)
